# Supplementary material
Source: HighWire-hosted journal article supplement (https://jnm.snmjournals.org/highwire/filestream/94179/field_highwire_adjunct_files/0/jnm087676_Supplemental_Tables.pdf)
Supplement: jnm087676_Supplemental_Tables.pdf [file jnm087676_Supplemental_Tables.pdf]

Supplemental Table 1. Positive rate of T/M ratio and other biomarkers in pulmonary metastatic tumors

|                                          | High T/M ratio | Glut1        | Glut3       | Hexo I      | HIF-1 $\alpha$ | VEGF        | CD34        |
|------------------------------------------|----------------|--------------|-------------|-------------|----------------|-------------|-------------|
| <b>All cases</b><br>(n=146)              | 79<br>(55%)    | 104<br>(73%) | 10<br>(7%)  | 82<br>(57%) | 102<br>(71%)   | 70<br>(49%) | 63<br>(44%) |
| <b>Colon cancer</b><br>(n=80)            | 48<br>(60%)    | 66<br>(83%)  | 1<br>(1.3%) | 41<br>(51%) | 60<br>(75%)    | 36<br>(45%) | 22<br>(28%) |
| <b>Sarcoma</b><br>(n=17)                 | 5<br>(29%)     | 4<br>(24%)   | 2<br>(12%)  | 5<br>(29%)  | 5<br>(29%)     | 5<br>(29%)  | 9<br>(53%)  |
| <b>Head and neck cancer</b><br>(n=14)    | 5<br>(33%)     | 9<br>(64%)   | 2<br>(14%)  | 9<br>(64%)  | 8<br>(67%)     | 6<br>(43%)  | 8<br>(67%)  |
| <b>Breast cancer</b><br>(n=9)            | 4<br>(44%)     | 7<br>(78%)   | 1<br>(11%)  | 9<br>(100%) | 9<br>(100%)    | 7<br>(78%)  | 7<br>(78%)  |
| <b>Genital cancer</b><br>(n=12)          | 8<br>(66%)     | 11<br>(92%)  | 2<br>(17%)  | 10<br>(83%) | 10<br>(83%)    | 8<br>(67%)  | 7<br>(58%)  |
| <b>Gastrointestinal cancer</b><br>(n=10) | 7<br>(70%)     | 6<br>(60%)   | 0<br>(0%)   | 5<br>(50%)  | 8<br>(80%)     | 6<br>(60%)  | 8<br>(80%)  |
| <b>Other</b><br>(n=4)                    | 2<br>(50%)     | 1<br>(25%)   | 2<br>(50%)  | 3<br>(75%)  | 2<br>(50%)     | 2<br>(50%)  | 2<br>(50%)  |

Abbreviation: Glut1, glucose transporter 1; Glut3, glucose transporter 3; Hexo I, hexokinase I; VEGF, vascular endothelial growth factor.

**Supplemental Table 2. Relationship between FDG uptake and expression of biomarkers**

| Biomarker                   | Glut1            | Glut3             | Hexo I           | HIF-1 $\alpha$    | VEGF              | CD34              |
|-----------------------------|------------------|-------------------|------------------|-------------------|-------------------|-------------------|
| <b>Metastases (n=146)</b>   |                  |                   |                  |                   |                   |                   |
| Spearman $\gamma$           | 0.4579           | -0.0552           | 0.3921           | 0.3654            | 0.5528            | 0.2342            |
| 95% CI                      | 0.3147 to 0.5806 | -0.2204 to 0.1130 | 0.2407 to 0.5249 | 0.2111 to 0.5019  | 0.4248 to 0.6591  | 0.0696 to 0.3862  |
| <i>p</i> -value             | < 0.0001         | 0.5078            | < 0.0001         | < 0.0001          | < 0.0001          | 0.0044            |
| <b>AC (n=103)</b>           |                  |                   |                  |                   |                   |                   |
| Spearman $\gamma$           | 0.4043           | 0.0226            | 0.2851           | 0.2628            | 0.4814            | 0.2036            |
| 95% CI                      | 0.2232 to 0.5585 | -0.1773 to 0.2208 | 0.0911 to 0.4582 | 0.0672 to 0.4390  | 0.3122 to 0.6210  | 0.0046 to 0.3870  |
| <i>p</i> -value             | <0.0001          | 0.8202            | 0.0035           | 0.0073            | <0.0001           | 0.0391            |
| <b>SQC (n=13)</b>           |                  |                   |                  |                   |                   |                   |
| Spearman $\gamma$           | 0.5805           | -0.5189           | 0.5716           | 0.6858            | 0.6841            | 0.0359            |
| 95% CI                      | 0.0249 to 0.8621 | -0.8376 to 0.063  | 0.0116 to 0.8586 | 0.1990 to 0.9011  | 0.1960 to 0.9006  | -0.5387 to 0.5878 |
| <i>p</i> -value             | 0.0375           | 0.0692            | 0.0413           | 0.0097            | 0.0099            | 0.9071            |
| <b>Sarcoma (n=17)</b>       |                  |                   |                  |                   |                   |                   |
| Spearman $\gamma$           | 0.6654           | 0.2196            | 0.6932           | 0.7118            | 0.7106            | 0.2603            |
| 95% CI                      | 0.2572 to 0.8721 | -0.3060 to 0.6427 | 0.3046 to 0.8839 | 0.3376 to 0.8917  | 0.3355 to 0.8912  | -0.2664 to 0.6673 |
| <i>p</i> -value             | 0.0036           | 0.3970            | 0.0020           | 0.0014            | 0.0014            | 0.3130            |
| <b>Lung cancer (n=138)</b>  |                  |                   |                  |                   |                   |                   |
| Spearman $\gamma$           | 0.7355           | 0.0736            | 0.7046           | 0.7088            | 0.7033            | 0.6691            |
| 95% CI                      | 0.6451 to 0.8056 | -0.0995 to 0.2426 | 0.6061 to 0.7818 | 0.6113 to 0.7851  | 0.6045 to 0.7809  | 0.5617 to 0.7543  |
| <i>p</i> -value             | < 0.0001         | 0.3905            | < 0.0001         | < 0.0001          | < 0.0001          | <0.0001           |
| <b>AC (n=93)</b>            |                  |                   |                  |                   |                   |                   |
| Spearman $\gamma$           | 0.7365           | 0.0492            | 0.7063           | 0.6327            | 0.6990            | 0.6529            |
| 95% CI                      | 0.6231 to 0.8196 | -0.1620 to 0.2563 | 0.5830 to 0.7978 | 0.4877 to 0.7437  | 0.5735 to 0.7925  | 0.5136 to 0.7487  |
| <i>p</i> -value             | < 0.0001         | 0.6389            | < 0.0001         | < 0.0001          | < 0.0001          | < 0.0001          |
| <b>SQC (n=45)</b>           |                  |                   |                  |                   |                   |                   |
| Spearman $\gamma$           | 0.3448           | 0.0218            | 0.4524           | 0.6492            | 0.3808            | 0.2892            |
| 95% CI                      | 0.0480 to 0.5856 | -0.2818 to 0.3215 | 0.1745 to 0.6636 | 0.4320 to 0.7952  | 0.0892 to 0.6122  | -0.0137 to 0.5435 |
| <i>p</i> -value             | 0.0204           | 0.8869            | 0.0018           | < 0.0001          | 0.0099            | 0.0540            |
| <b>Control group (n=29)</b> |                  |                   |                  |                   |                   |                   |
| Spearman $\gamma$           | 0.4930           | 0.3376            | 0.5162           | 0.2828            | 0.2353            | 0.0351            |
| 95% CI                      | 0.1432 to 0.7333 | -0.0444 to 0.6335 | 0.1735 to 0.7474 | -0.1047 to 0.5958 | -0.1543 to 0.5619 | -0.1260 to 0.5817 |
| <i>p</i> -value             | 0.0066           | 0.0733            | 0.0041           | 0.1372            | 0.2191            | 0.1684            |
